# Supplementary material for: Thrombin Activity in Rodent and Human Skin: Modified by Inflammation and Correlates with Innervation
Source: MDPI journal article supplement (doi:10.3390/biomedicines10061461), 2022-06-20
Supplement: s1 [file s1]

**Table S1.** List of diseases and inflammatory markers of patients with an inflammatory cause of neuropathy.

| #    | Diseases                                                     | Markers          | Other                        |
|------|--------------------------------------------------------------|------------------|------------------------------|
| SK1  | Crohn's                                                      |                  |                              |
| SK3  | Fibromyalgia                                                 |                  |                              |
| SK6  | Fibromyalgia,<br>Hashimoto's                                 |                  |                              |
| SK15 | Psoriatic arthritis                                          |                  |                              |
| SK18 |                                                              | High CRP and ESR |                              |
| SK19 |                                                              |                  | Silicone implants            |
| SK20 |                                                              |                  | Post COVID-19                |
| SK26 | Fibromyalgia                                                 |                  |                              |
| SK31 | HIV, Syphilis                                                |                  |                              |
| SK32 | Crohn's                                                      |                  |                              |
| SK33 | Fibromyalgia, Graves,<br>Celiac, Relapsing<br>polychondritis |                  |                              |
| SK34 | Multiple sclerosis                                           |                  |                              |
| SK40 |                                                              |                  | Post-vaccination<br>syndrome |
| SK45 | Hashimoto's<br>Thyroiditis                                   |                  |                              |
| SK46 |                                                              | High CRP and ESR |                              |
| SK47 |                                                              |                  | Post-vaccination<br>syndrome |
| SK48 |                                                              | High CRP         |                              |
| SK51 | Psoriatic arthritis                                          |                  |                              |
| SK55 | Endometriosis                                                |                  |                              |

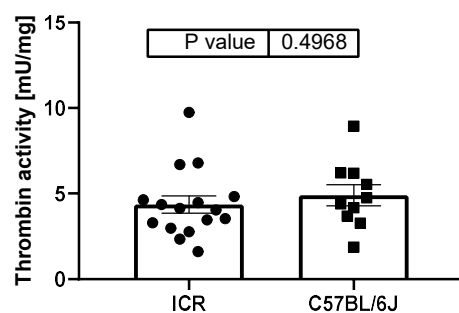

**Figure S1.** Thrombin activity in the skin of ICR VS C57BL/6J mice: no significant difference was found in skin thrombin activity between the two strains.
